# Supplementary material for: Boronate affinity-based surface-imprinted quantum dots as novel fluorescent nanosensors for the rapid and efficient detection of rutin
Source: Royal Society of Chemistry journal article supplement (doi:10.1039/c9ay00787c), 2019-01-01
Supplement: c9ay00787c1.pdf [file c9ay00787c1.pdf]

## Supporting Information

# **Boronate affinity-based surface-imprinted quantum dots as novel fluorescent nanosensors for rapid and efficient detection of rutin**

Daojin Li\*, Nan Wang, Fangfang Wang, Qi Zhao

College of Chemistry and Chemical Engineering, and Henan Key Laboratory of  
Function-Oriented Porous Materials, Luoyang Normal University, Luoyang 471934, P. R.  
China

## Supporting Figures

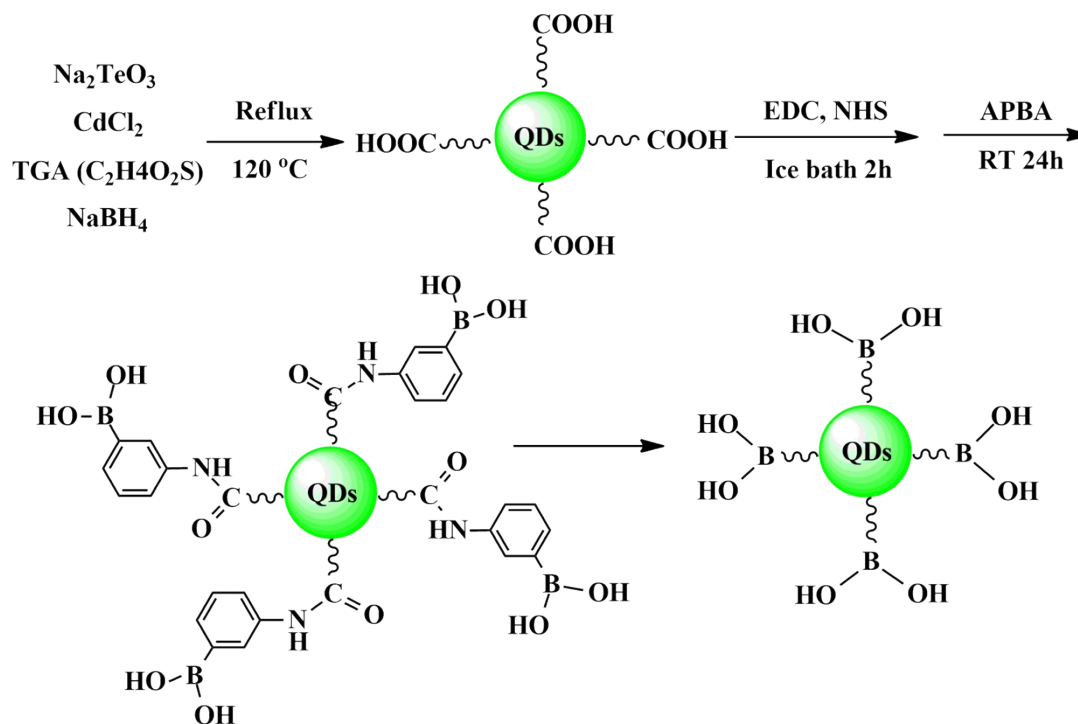

**Fig. S1** Synthesis routes of BA-CdTe QDs.

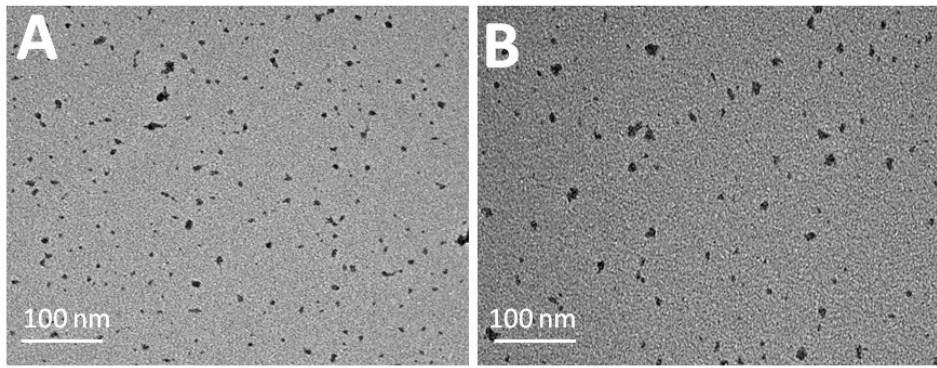

**Fig. S2** TEM characterization of BA-CdTe QDs (A) and (B) BA-CdTe@MIPs QDs

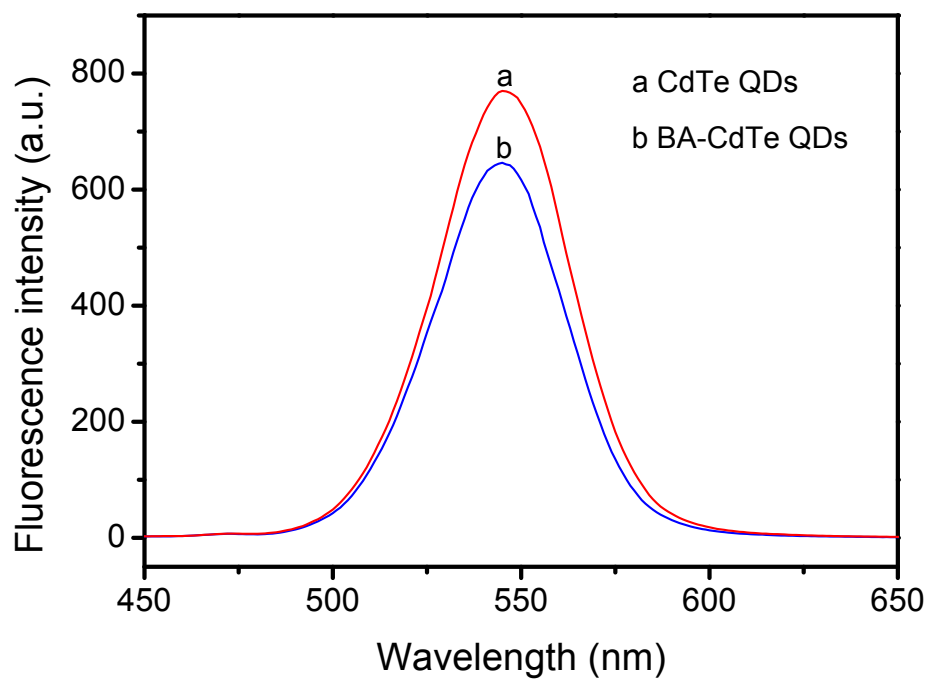

**Fig. S3** Fluorescence spectra of CdTe QDs (a) and BA-CdTe QDs (b).

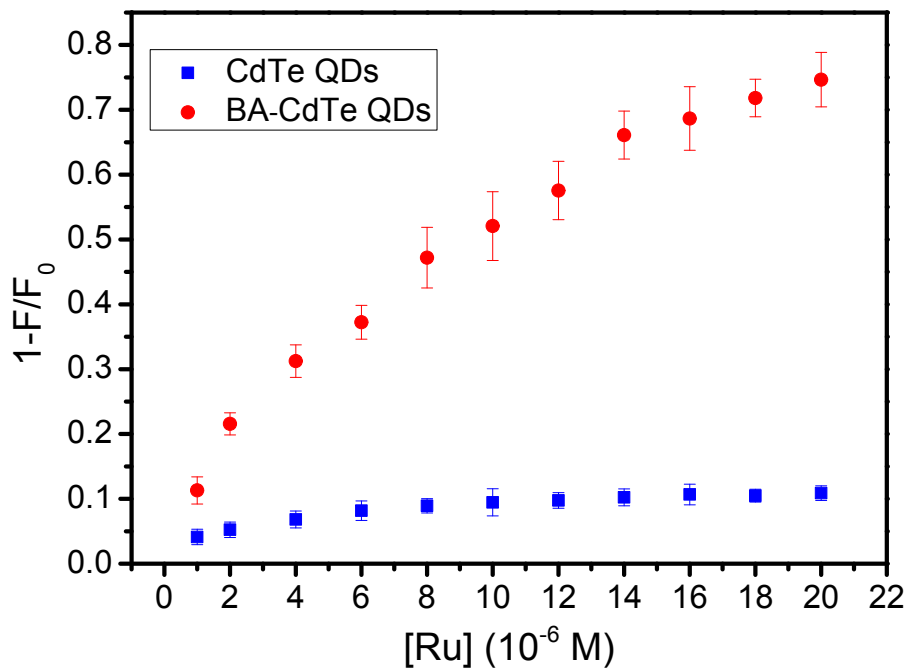

**Fig. S4** Fluorescence intensity change of CdTe QDs and BA-CdTe QDs with various amount of Ru.

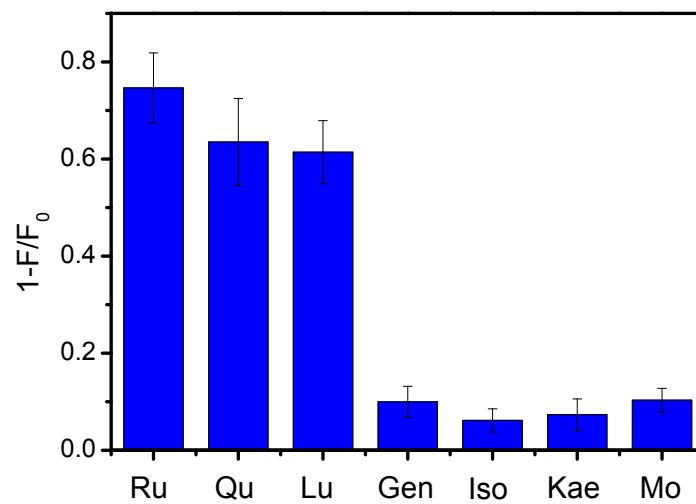

**Fig. S5** Binding behaviors of cis-diol-containing compounds (Ru, Qu and Lu) and non-cis-diol-containing compounds (Gen, Iso, Kae and Mo) on the BA-CdTe QDs. [Ru] = [Qu] = [Lu] = [Gen] = [Kae] = [Mo] = [Iso] =  $2 \times 10^{-5}$  M.

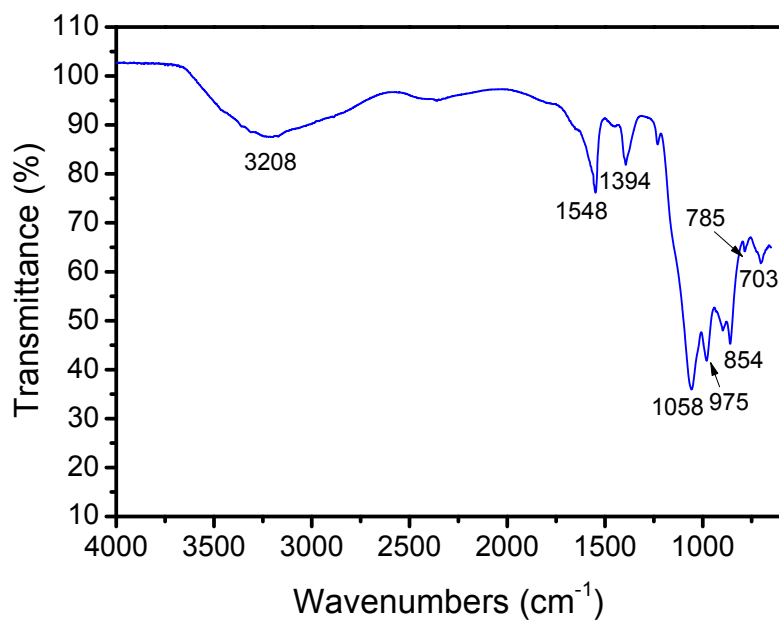

**Fig. S6** FT-IR spectra of the BA-CdTe@MIPs QDs.

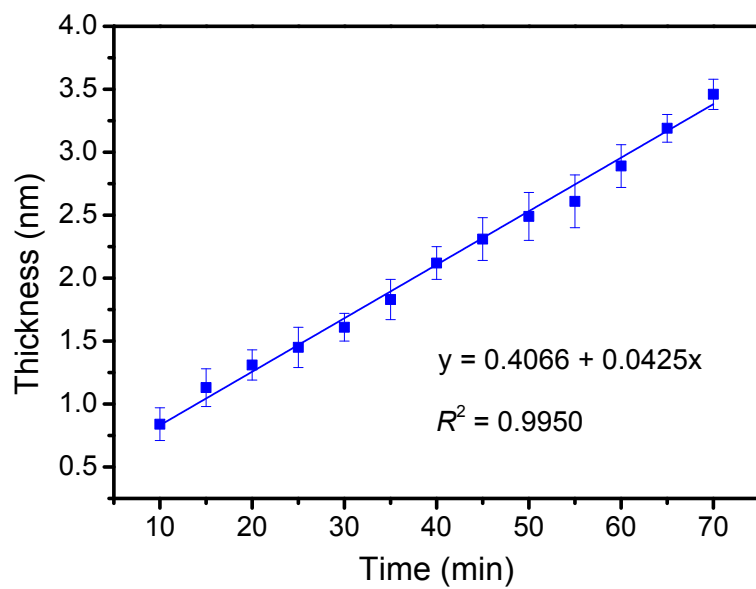

**Fig. S7** Dependence of the thickness of the silica thin layer on polymerization time.



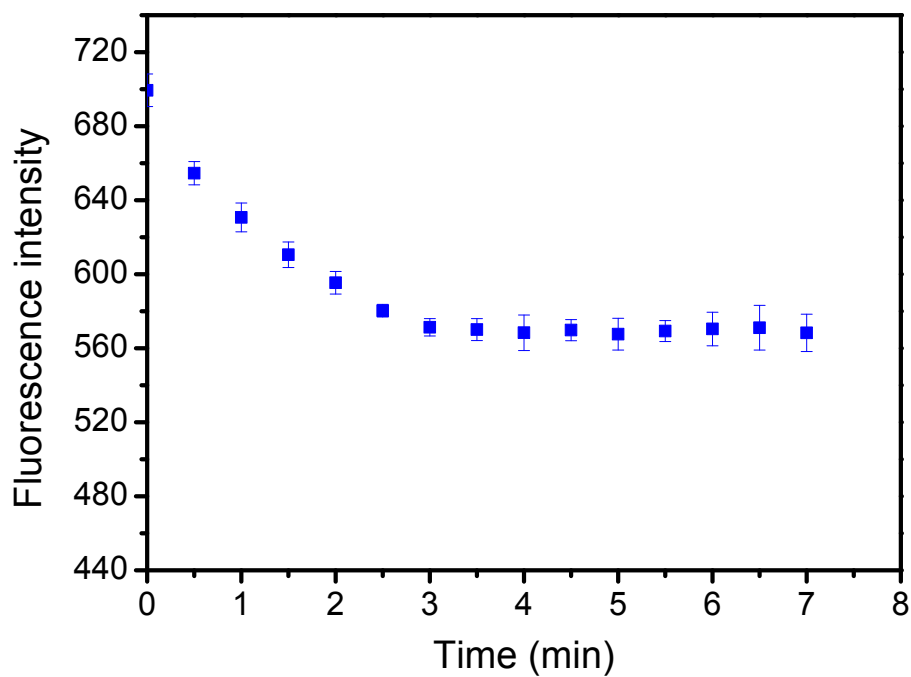

**Fig. S8** Effect of incubation time on the fluorescence intensity of BA-CdTe@MIPs QDs after adding Ru. Fluorescence value was obtained at a fixed excitation wavelength of 545 nm; [Ru] =  $2 \times 10^{-5}$  M.
